# Supplementary material for: Therapeutic Effects of Xianlu Oral Solution on Rats with Oligoasthenozoospermia through Alleviating Apoptosis and Oxidative Stress
Source: Hindawi journal article supplement (doi:10.1155/2022/1269530), 2022-06-18

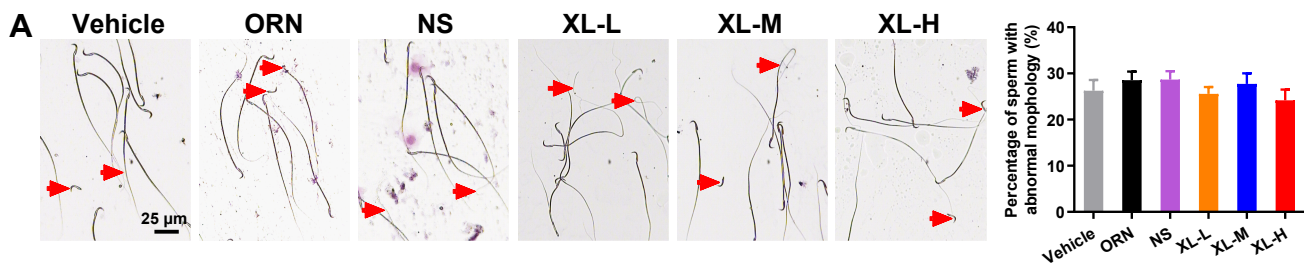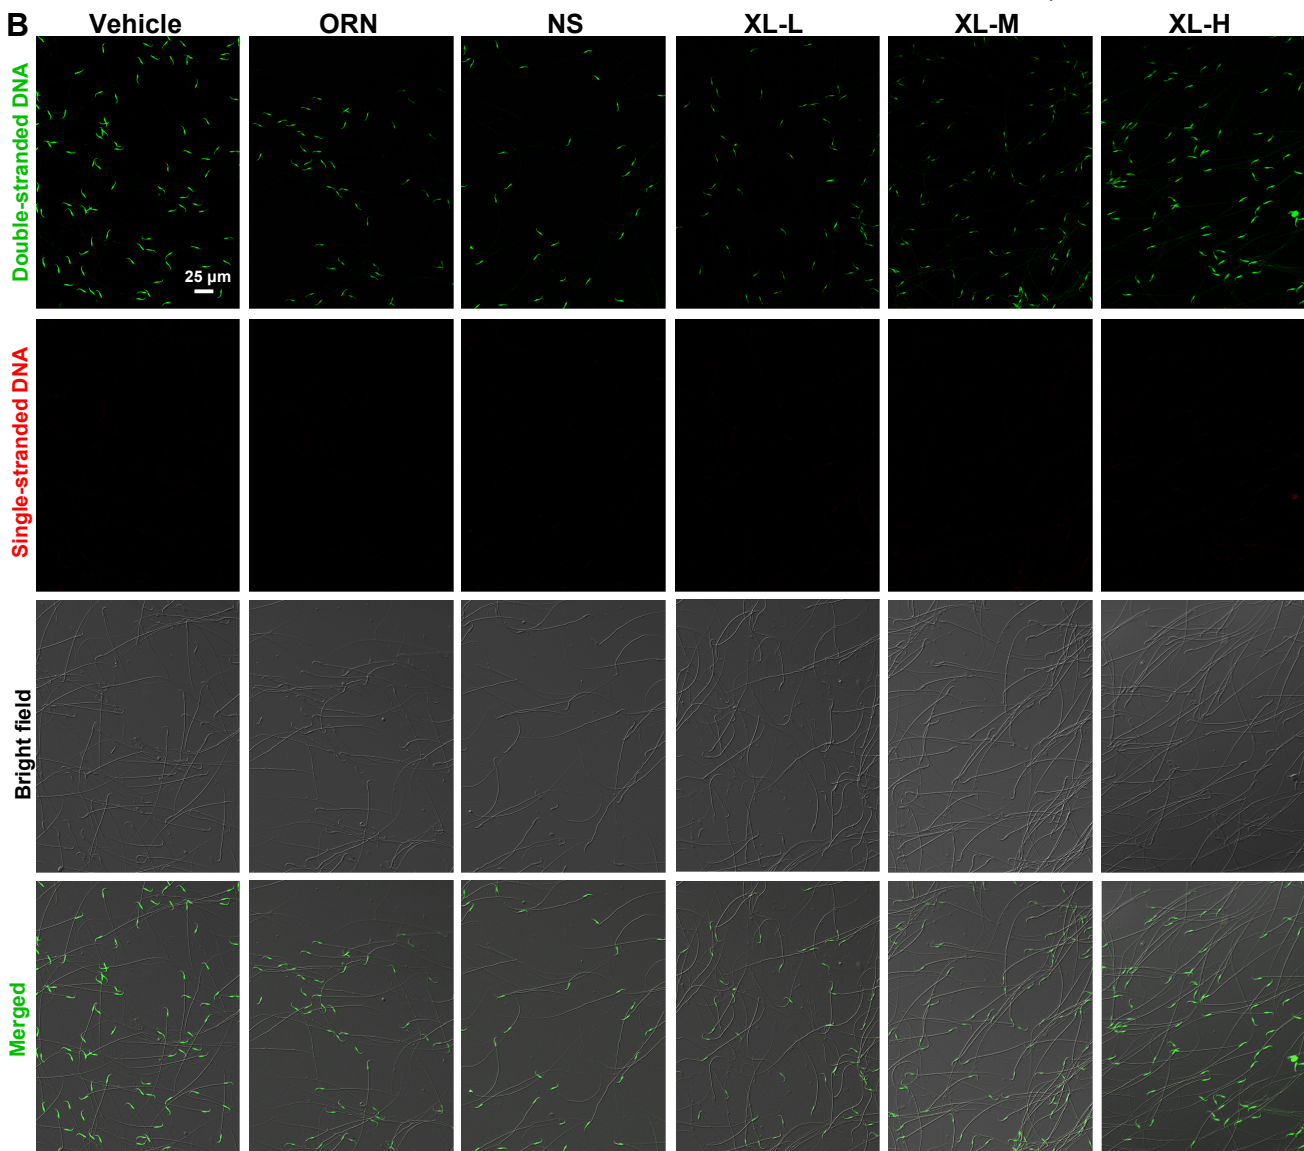

Supplement: f1 [file 1269530.f1.pdf]
